# Supplementary material for: Physicians’ views on the usefulness and feasibility of identifying and disclosing patients’ last phase of life: a focus group study
Source: HighWire-hosted journal article supplement (doi:10.1136/bmjspcare-2020-002764), 2021-02-22
Supplement: bmjspcare-2020-002764supp001_data_supplement.pdf [file bmjspcare-2020-002764supp001_data_supplement.pdf]

## Supplementary File: Coding tree

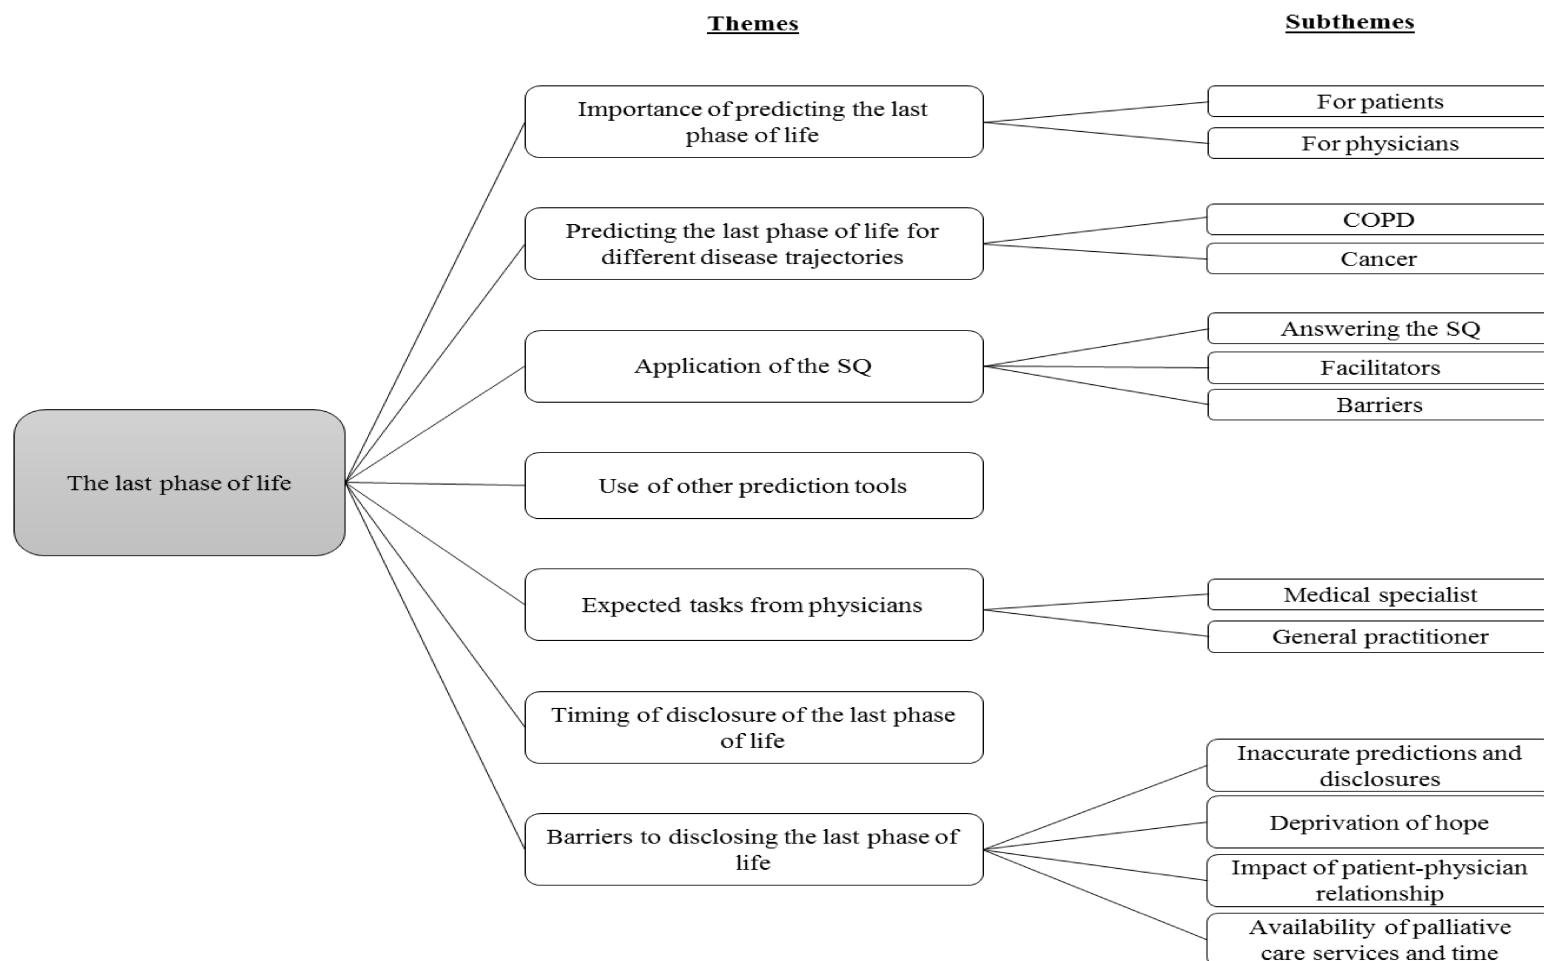

*COPD: Chronic Obstructive Pulmonary Disease; SQ: Surprise Question.*
